# Supplementary material for: Direct determination of metal to halide mole ratios in platinum complex anions [PtCl6−nBrn]2− (n = 0–6) by means of HPLC-ICP-OES using Cl, Br and Pt emissions of all separated species
Source: Royal Society of Chemistry journal article supplement (doi:10.1039/c2ja10342g), 2012-01-01
Supplement: c2ja10342g.pdf [file c2ja10342g.pdf]

## Supplementary Information: Koch *et al*

### Experimental

HPLC grade acetonitrile was obtained from Merck (608-001-00-3). All aqueous solutions were prepared using ultrapure Milli-Q water (> 18M $\Omega$ ). Analytical grade purity tetrabutyl-ammonium nitrate (TBA<sup>+</sup>NO<sub>3</sub><sup>-</sup>), sodium acetate and glacial acetic acid were obtained from Sigma-Aldrich.

Mobile phases were prepared by the addition of acetonitrile to stock solutions of 0.05 M tetrabutyl-ammonium nitrate and 0.1 M acetate buffer (pH = 4.6) to give 55% (v/v) CH<sub>3</sub>CN:H<sub>2</sub>O solutions. All mobile phases were filtered through 0.45  $\mu$ m HV filters (Millipore Corporation, HVLP04700) under vacuum and degassed for 15 min in an ultrasonic bath before use. Na<sub>2</sub>PtCl<sub>6</sub>·2H<sub>2</sub>O (Johnson Matthey PLC, Precious metals division) was of analytical reagent grade quality and was dried in vacuo and stored in a desiccator prior to use.

### ICP-OES

Determination of the samples Pt, Cl<sup>-</sup> and Br<sup>-</sup> concentrations was accomplished with a SPECTRO *Arcos* ICP-OES spectrometer operating with a RF power set to 1400 W using a Burgener T2002 nebulizer and cyclonic spray chamber. The nebulizer flow rate was set at 0.8 mLmin<sup>-1</sup>, auxiliary gas flow rate was set to 1 L.min<sup>-1</sup> and coolant flow rate to 13 L.min<sup>-1</sup>. Pt standard solutions were prepared from a 1000 ppm  $\pm$  3 ppm stock solution in a 500 mL 10% HCl matrix obtained from De Bruyn Spectroscopy (Ultraspec). Cl<sup>-</sup> and Br<sup>-</sup> standard solutions were prepared from NaCl and NaBr (puriss; 99 %) obtained from Sigma-Aldrich, respectively. NaCl and NaBr was dried at 60°C for 1 day and cooled in a vacuo desiccator prior to preparation of the relevant standard solutions. Matrix matching was strictly upheld throughout the preparation of all the standard solutions (Pt, Cl and Br). The Pt, Cl<sup>-</sup> and Br<sup>-</sup> concentrations obtained by means of ICP-OES for the samples 1, 2 and 3 used to obtain Figures 1a, b and c respectively, shown in Table S1.

### IP-RP-HPLC-ICP-OES

The column used throughout this study was a Gemini C<sub>18</sub>, 250 mm x 4.6 mm i.d., 5  $\mu$ m particles. Column conditioning comprised of mobile phase passage through the column for 45 minutes prior to analysis followed by a 45 minute post-analysis wash with pure acetonitrile. Platinum samples, Table S1, were prepared in an HCl matrix. The bromido Pt<sup>IV</sup> species was obtained by the addition of appropriate amounts of NaBr, Table S1. Prior to injection each Pt sample was diluted 3 times and injected as a 40 $\mu$ l aliquot onto the C<sub>18</sub> reversed phase column unless stated otherwise. The HPLC hyphenated ICP-OES setup comprised of a Varian *Prostar* liquid chromatograph equipped with a binary 210 solvent delivery module and a 410 auto-sampler operating at an optimized flow rate of mobile phase of 0.8 mL.min<sup>-1</sup> connected the same SPECTRO *Arcos* ICP-OES spectrometer mentioned above, operating with a RF power set to 1600 W using a Burgener

T2002 nebulizer and cyclonic spray chamber. The nebulizer flow rate was set to  $0.6 \text{ mLmin}^{-1}$ , auxiliary gas flow to  $2 \text{ L.min}^{-1}$ , and coolant flow rate to  $17 \text{ L.min}^{-1}$ . The aliquot was transferred directly from the column to the nebulizer *via* PEEK tubing with internal diameter equal to 0.12 mm.

**Table S1.** Total experimental Pt, Cl<sup>-</sup> and Br<sup>-</sup> concentrations as determined by means of ICP-OES directly for the 3 samples used in this study. Samples were prepared by the addition of 2.0 M stock solutions containing appropriate quantities of HCl and NaBr to weighed amounts of Na<sub>2</sub>PtCl<sub>6</sub> to give a known [Pt] ~ 10 mM in 5 ml. These samples were dilute three times with the relevant mobile phase before injection.

| Sample | Experimental concentration (mol L <sup>-1</sup> ) |                     |                     |
|--------|---------------------------------------------------|---------------------|---------------------|
|        | Pt                                                | Cl                  | Br                  |
| 1      | $0.0127 \pm 0.0002$                               | $0.1550 \pm 0.0053$ | –                   |
| 2      | $0.0125 \pm 0.0002$                               | $0.1580 \pm 0.0054$ | $0.0246 \pm 0.0002$ |
| 3      | $0.0160 \pm 0.0002$                               | $0.0840 \pm 0.0033$ | $0.2362 \pm 0.0021$ |
